# Supplementary material
Source: PubMed Central journal article supplement (PMC4313148)
Supplement: JCM.03487-13_zjm999093676so1.pdf [file JCM.03487-13_zjm999093676so1.pdf]

**Supplementary table 1: Characteristics of 70 isolates and 25 references**

| Data source | Strain   | Toxin genotype | Year collection | Source     | Site collection* | Sequence type | Accession no. |             | <i>tcdA</i> type | <i>tcdB</i> type |
|-------------|----------|----------------|-----------------|------------|------------------|---------------|---------------|-------------|------------------|------------------|
|             |          |                |                 |            |                  |               | <i>tcdA</i>   | <i>tcdB</i> |                  |                  |
| This study  | US1      | A-B+           | unknown         | unknown    | US               | 37            | KC292088      | KC292128    | A15              | B13              |
|             | UK1      | A+B+           | unknown         | unknown    | UK               | 1             | KC292117      | KC292158    | A13              | B12              |
|             | VPI10463 | A+B+           | unknown         | unknown    | Japan            | 46            | KC292122      | KC292162    | A01              | B01              |
|             | ATCC9689 | A+B+           | unknown         | unknown    | France           | 3             | KC292070      | KC292135    | A07              | B06              |
|             | BJ08     | A-B+           | 2010            | outpatient | BJ               | 37            | KC292068      | KC292149    | A15              | B13              |
|             | GZ1      | A+B+           | 1980's          | inpatient  | GD               | 35            | KC292061      | KC292189    | A03              | B04              |
|             | GZ2      | A-B+           | 1980's          | inpatient  | GD               | 37            | KC292109      | KC292156    | A15              | B13              |
|             | GZ3      | A-B+           | 1980's          | inpatient  | GD               | 37            | KC292078      | KC292175    | A15              | B13              |
|             | GZ5      | A+B+           | 1980's          | inpatient  | GD               | 2             | KC292058      | KC292145    | A09              | B06              |
|             | GZ6      | A-B+           | 1980's          | inpatient  | GD               | 37            | KC292124      | KC292191    | A15              | B13              |
|             | GZ7      | A+B+           | 1980's          | inpatient  | GD               | 2             | KC292066      | KC292137    | A09              | B06              |
|             | GZ8      | A-B+           | 1980's          | inpatient  | GD               | 37            | KC292121      | KC292163    | A15              | B13              |
|             | GZ9      | A-B+           | 1980's          | inpatient  | GD               | 37            | KC292064      | KC292165    | A15              | B13              |
|             | GZ11     | A-B+           | 1980's          | inpatient  | GD               | 37            | KC292118      | KC292139    | A15              | B13              |
|             | GZ12     | A-B+           | 1980's          | inpatient  | GD               | 37            | KC292123      | KC292164    | A15              | B13              |
|             | GZ13     | A-B+           | 1980's          | inpatient  | GD               | 37            | KC292077      | KC292166    | A15              | B13              |
|             | GZ14     | A-B+           | 1980's          | inpatient  | GD               | 37            | KC292056      | KC292188    | A15              | B13              |
|             | SH1      | A+B+           | 2007            | inpatient  | SH               | 35            | KC292098      | KC292173    | A03              | B04              |
|             | SH2      | A+B+           | 2007            | inpatient  | SH               | 35            | KC292110      | KC292141    | A03              | B04              |
|             | SH3      | A+B+           | 2007            | inpatient  | SH               | 2             | KC292111      | KC292140    | A06              | B07              |
|             | SH4      | A+B+           | 2008            | inpatient  | SH               | 2             | KC292114      | KC292131    | A06              | B07              |
| SH5         | A+B+     | 2008           | inpatient       | SH         | 2                | KC292069      | KC292168      | A06         | B07              |                  |
| SH6         | A+B+     | 2008           | inpatient       | SH         | 2                | KC292090      | KC292136      | A06         | B07              |                  |
| SH7         | A+B+     | 2008           | inpatient       | SH         | 2                | KC292095      | KC292127      | A06         | B07              |                  |
| SH8         | A+B+     | 2008           | inpatient       | SH         | 2                | KC292057      | KC292150      | A06         | B07              |                  |
| SH9         | A+B+     | 2008           | inpatient       | SH         | 2                | KC292094      | KC292185      | A06         | B07              |                  |
| SH10        | A+B+     | 2008           | inpatient       | SH         | 35               | KC292086      | KC292167      | A03         | B04              |                  |
| SH11        | A+B+     | 2009           | inpatient       | SH         | 35               | KC292105      | KC292143      | A03         | B04              |                  |

|       |      |      |            |    |     |          |          |     |     |
|-------|------|------|------------|----|-----|----------|----------|-----|-----|
| SH12  | A+B+ | 2009 | inpatient  | SH | 35  | KC292065 | KC292171 | A03 | B04 |
| SH13  | A+B+ | 2009 | inpatient  | SH | 2   | KC292119 | KC292178 | A06 | B07 |
| SH14  | A+B+ | 2009 | inpatient  | SH | 2   | KC292075 | KC292174 | A06 | B07 |
| SH182 | A-B+ | 2011 | unknown    | SH | 37  | KC292083 | KC292146 | A15 | B13 |
| JN012 | A+B+ | 2012 | inpatient  | SD | 3   | KC292106 | KC292134 | A07 | B06 |
| JN031 | A+B+ | 2012 | inpatient  | SD | 3   | KC292071 | KC292177 | A07 | B06 |
| JN033 | A+B+ | 2012 | inpatient  | SD | 3   | KC292081 | KC292154 | A07 | B06 |
| JN037 | A+B+ | 2012 | inpatient  | SD | 3   | KC292093 | KC292151 | A07 | B06 |
| JN043 | A+B+ | 2012 | inpatient  | SD | 3   | KC292100 | KC292161 | A07 | B06 |
| JN071 | A+B+ | 2012 | inpatient  | SD | 3   | KC292115 | KC292183 | A07 | B06 |
| JN090 | A+B+ | 2012 | outpatient | SD | 3   | KC292096 | KC292133 | A07 | B06 |
| JN128 | A+B+ | 2012 | inpatient  | SD | 3   | KC292101 | KC292126 | A07 | B06 |
| JN159 | A+B+ | 2012 | outpatient | SD | 3   | KC292087 | KC292176 | A07 | B06 |
| SD1   | A-B+ | 2011 | outpatient | SD | 37  | KC292085 | KC292142 | A15 | B13 |
| SD2   | A+B+ | 2011 | outpatient | SD | 35  | KC292113 | KC292186 | A03 | B04 |
| HN581 | A+B+ | 2010 | outpatient | HN | 35  | KC292107 | KC292129 | A03 | B04 |
| HN582 | A-B+ | 2010 | outpatient | HN | 37  | KC292108 | KC292170 | A15 | B13 |
| HN583 | A+B+ | 2010 | outpatient | HN | 35  | KC292091 | KC292179 | A03 | B04 |
| HN587 | A+B+ | 2010 | outpatient | HN | 35  | KC292082 | KC292192 | A03 | B04 |
| HN588 | A-B+ | 2010 | outpatient | HN | 37  | KC292074 | KC292180 | A15 | B13 |
| HN603 | A+B+ | 2010 | outpatient | HN | 35  | KC292097 | KC292172 | A03 | B04 |
| HN608 | A+B+ | 2010 | outpatient | HN | 3   | KC292103 | KC292147 | A07 | B06 |
| ZR2   | A+B+ | 2010 | outpatient | BJ | 102 | KC292112 | KC292153 | A04 | B08 |
| ZR5   | A+B+ | 2010 | outpatient | BJ | 55  | KC292080 | KC292184 | A05 | B06 |
| ZR8   | A-B+ | 2010 | outpatient | BJ | 37  | KC292079 | KC292182 | A15 | B13 |
| ZR9   | A-B+ | 2010 | outpatient | BJ | 37  | KC292063 | KC292152 | A15 | B13 |
| ZR17  | A+B+ | 2010 | inpatient  | BJ | 5   | KC292104 | KC292157 | A12 | B09 |
| ZR20  | A+B+ | 2010 | inpatient  | BJ | 54  | KC292102 | KC292155 | A10 | B02 |
| ZR27  | A+B+ | 2010 | outpatient | BJ | 99  | KC292073 | KC292187 | A03 | B04 |
| ZR30  | A+B+ | 2010 | outpatient | BJ | 54  | KC292084 | KC292194 | A10 | B02 |
| ZR4   | A+B+ | 2010 | outpatient | BJ | 54  | KC292089 | KC292138 | A10 | B02 |
| ZR41  | A+B+ | 2010 | inpatient  | BJ | 92  | KC292120 | KC292169 | A05 | B06 |

|           |              |         |         |            |             |         |              |          |     |     |
|-----------|--------------|---------|---------|------------|-------------|---------|--------------|----------|-----|-----|
|           | ZR47         | A-B+    | 2010    | outpatient | BJ          | 37      | KC292060     | KC292160 | A15 | B13 |
|           | ZR48         | A+B+    | 2010    | outpatient | BJ          | 55      | KC292059     | KC292144 | A05 | B06 |
|           | ZR50         | A+B+    | 2010    | inpatient  | BJ          | 53      | KC292116     | KC292148 | A11 | B04 |
|           | ZR74         | A+B+    | 2010    | inpatient  | BJ          | 54      | KC292072     | KC292159 | A10 | B02 |
|           | ZR75         | A+B+    | 2010    | inpatient  | BJ          | 8       | KC292099     | KC292195 | A04 | B06 |
|           | ZR77         | A+B+    | 2010    | inpatient  | BJ          | 129     | KC292125     | KC292193 | A08 | B06 |
|           | ZR80         | A+B+    | 2010    | inpatient  | BJ          | 35      | KC292092     | KC292190 | A02 | B05 |
|           | ZR81         | A+B+    | 2010    | outpatient | BJ          | 8       | KC292062     | KC292181 | A04 | B06 |
|           | ZR83         | A+B+    | 2010    | inpatient  | BJ          | 35      | KC292067     | KC292130 | A03 | B04 |
|           | ZR84         | A+B+    | 2010    | outpatient | BJ          | 3       | KC292076     | KC292132 | A07 | B06 |
| Published | 630          | A+B+    | 1982    | Human      | Switzerland | 54      | NC_009089    |          | A10 | B02 |
|           | M68          | A-B+    | 2006    | Human      | Ireland     | 37      | FN668375     |          | A15 | B13 |
|           | CF5          | A-B+    | 1995    | Human      | Belgium     | 37      | FN665652     |          | A15 | B13 |
|           | R20291       | A+B+    | 2006    | Human      | UK          | 1       | NC_013316    |          | A13 | B12 |
|           | M120         | A+B+    | 2007    | Human      | UK          | 11      | NC_017174    |          | A14 | B10 |
|           | 8864         | A-B+    | <1985   | Human      | UK          | unknown | AJ011301     |          | A16 | B16 |
|           | CD196        | A+B+    | 1985    | Human      | France      | 1       | NC_013315    |          | A13 | B12 |
|           | CIP_107932   | unknown | unknown | unknown    | France      | 1       | ABKK00000000 | unknown  |     | B12 |
|           | QCD_37x79    | A+B+    | 2005    | unknown    | Canada      | 1       | ABHG00000000 |          | A13 | B12 |
|           | QCD_66c26    | A+B+    | unknown | unknown    | Canada      | 1       | ABFD00000000 |          | A13 | B12 |
|           | QCD_76w55    | A+B+    | 1988    | unknown    | Canada      | 1       | ABHE00000000 |          | A13 | B12 |
|           | QCD_97b34    | A+B+    | 2004    | unknown    | Canada      | 1       | ABHF00000000 |          | A13 | B12 |
|           | QCD_32g58    | A-B+    | unknown | unknown    | Canada      | 1       | AAML00000000 | unknown  |     | B12 |
|           | QCD_23m63    | unknown | unknown | unknown    | Canada      | unknown | ABKL00000000 | unknown  |     | B11 |
|           | QCD_63q42    | unknown | unknown | unknown    | Canada      | unknown | ABHD00000000 | unknown  |     | B06 |
|           | 2007855      | A+B+    | 2007    | Bovine     | US          | 1       | NC_017178    |          | A13 | B12 |
|           | BI1          | A+B+    | 1988    | Human      | US          | 1       | NC_017177    |          | A13 | B12 |
|           | BI9          | A+B+    | 2001    | Human      | US          | 3       | FN668944     | unknown  |     | B06 |
|           | 002_P50_2011 | A-B+    | unknown | unknown    | US          | 37      | AGAA00000000 |          | A15 | B13 |
|           | 050_P50_2011 | A-B+    | unknown | unknown    | US          | 37      | AGAB00000000 |          | A15 | B13 |
|           | NAP07        | unknown | unknown | unknown    | US          | 11      | ADVM00000000 | unknown  |     | B10 |
|           | NAP08        | unknown | unknown | unknown    | US          | 11      | ADNX00000000 | unknown  |     | B10 |

|      |         |         |         |    |         |              |         |     |
|------|---------|---------|---------|----|---------|--------------|---------|-----|
| 6534 | unknown | unknown | unknown | US | unknown | ADEJ00000000 | unknown | B03 |
| 1470 | A-B+    | unknown | unknown | US | unknown | Z23277       | unknown | B15 |
| 5340 | unknown | unknown | unknown | US | unknown | AF217292     | unknown | B14 |

---

**Supplementary table 2: Primers for *tcdA* and *tcdB***

| <b>Gene</b> | <b>Primer ID</b>     | <b>Sequence (5'to3')</b>     |
|-------------|----------------------|------------------------------|
| <i>tcdA</i> | A1F                  | AGATGGTGCATGGTCAGTTG         |
|             | A1R                  | CATTTCCCAACGGTCTAGTC         |
|             | A2F                  | AATAGAGATGAACTTTATT          |
|             | A2R                  | CATCTCCTTGTAAGTGTATG         |
|             | A3F                  | AACAAAAATAGCACCATACT         |
|             | A3R                  | TAACACTTGCATCAAGTAAT         |
|             | A4F                  | AAGCAACATGCAATTTATTT         |
|             | A4R                  | CCACTGAAGTTGCCTTATCA         |
|             | A5F                  | TAAATGTACTACCTACAATAACAGAGGG |
|             | A5R                  | CTTGTATATAAATCAGGTGCTATCAATA |
|             | A6F                  | CTTGGATATGTAGAATTTAT         |
|             | A6R                  | AATCCTAAATGATCTCTATC         |
|             | A7F                  | TATTGATAGCACCTGATTTATATAAAG  |
|             | A7R                  | AGTTGAGGCTATGAAAGTGT         |
|             | A8F                  | GACCTAATGGATTTGAGTAT         |
|             | A8R                  | AATTTATTTTGGTAAAGTAT         |
|             | A9F                  | CACTTTCATAGCCTCAACTG         |
|             | A9R                  | GATGGTGATGAGGTGCAAAT         |
| <i>tcdB</i> | B1F                  | GGATATTCTGATAGAGAAAT         |
|             | B1R                  | TCACTATTTACATCTTTC           |
|             | B2F                  | GAAGAATATCATAATATGTC         |
|             | B2R                  | TTAATCTTAGGTCTATCAGA         |
|             | B3F                  | TTACAAGGAGATAAAATTAG         |
|             | B3R                  | TACTAACTTACCATTTACAG         |
|             | B4F                  | GAATTTAAACTAATAGAATC         |
|             | B4R                  | TCTTCTTTTTGTAAGTCCAA         |
|             | B5F                  | TACTTTTAGTTCCTTTAGCA         |
|             | B5R                  | TCAGATACAAATAAACCTTC         |
|             | B6F                  | GTTGATTTATTATCTAAATC         |
|             | B6R                  | GTAATAAATACACCTGTTTG         |
|             | B7F                  | TAATAACTTTGGAATGATGG         |
|             | B7R                  | TCACTTTCATTTTCCATATC         |
|             | B8F                  | GGAAATGAAGAAGGTGAAG          |
| B8R         | ACTTTGTAAGAATGTCAACT |                              |

**Supplementary table 3: *tcdA* types and distributions**

| Type | Representative Strain | Toxin genotype | Locations, STs and number of strains*                                               |
|------|-----------------------|----------------|-------------------------------------------------------------------------------------|
| A01  | VPI10463              | A+B+           | [Japan, ST46, 1]                                                                    |
| A02  | ZR80                  | A+B+           | [BJ, ST35, 1]                                                                       |
| A03  | GZ1                   | A+B+           | [GD, ST35, 1] [HN, ST35, 4] [SD, ST35, 1] [SH, ST35, 5] [BJ, ST35, 1] [BJ, ST99, 1] |
| A04  | ZR2                   | A+B+           | [BJ, ST102, 1] [BJ, ST8, 2]                                                         |
| A05  | ZR41                  | A+B+           | [BJ, ST92, 1] [BJ, ST55, 2]                                                         |
| A06  | SH13                  | A+B+           | [SH, ST2, 9]                                                                        |
| A07  | ATCC9689              | A+B+           | [France, ST3, 1] [HN, ST3, 1] [SD, ST3, 9] [BJ, ST3, 1]                             |
| A08  | ZR77                  | A+B+           | [BJ, ST129, 1]                                                                      |

|     |        |      |                                                                                                                               |
|-----|--------|------|-------------------------------------------------------------------------------------------------------------------------------|
| A09 | GZ5    | A+B+ | [GD, ST2, 2]                                                                                                                  |
| A10 | 630    | A+B+ | [Switzerland, ST54, 1] [BJ, ST54, 4]                                                                                          |
| A11 | ZR50   | A+B+ | [BJ, ST53, 1]                                                                                                                 |
| A12 | ZR17   | A+B+ | [BJ, ST5, 1]                                                                                                                  |
| A13 | R20291 | A+B+ | [USA, ST1, 2] [Canada, ST1, 4] [UK, ST1, 2] [France, ST1, 1]                                                                  |
| A14 | M120   | A+B+ | [UK, ST11, 1]                                                                                                                 |
| A15 | M68    | A-B+ | [USA, ST37, 3] [GD, ST37, 9] [BJ, ST37, 4] [HN, ST37, 2] [Belgium, ST37, 1]<br>[Ireland, ST37, 1] [SD, ST37, 1] [SH, ST37, 1] |
| A16 | 8864   | A-B+ | [USA, unknown, 1]                                                                                                             |

---

**\*BJ: Beijing; SH: Shanghai; GD: Guangdong; SD: Shandong; HN: Henan.**

**Supplementary table 4: *tcdB* types and distributions**

| <b>Type</b> | <b>Representative Strain</b> | <b>Toxin genotype</b> | <b>Locations, STs and number of strains*</b>                                                                                                                   |
|-------------|------------------------------|-----------------------|----------------------------------------------------------------------------------------------------------------------------------------------------------------|
| B01         | VPI10463                     | A+B+                  | [Japan, ST46, 1]                                                                                                                                               |
| B02         | 630                          | A+B+                  | [Switzerland, ST54, 1] [BJ, ST54, 4]                                                                                                                           |
| B03         | 6534                         | A+B+                  | [USA, unknown, 1]                                                                                                                                              |
| B04         | GZ1                          | A+B+                  | [GD, ST35, 1] [HN, ST35, 4] [SD, ST35, 1] [SH, ST35, 5] [BJ, ST35, 1] [BJ, ST99, 1] [BJ, ST53, 1]                                                              |
| B05         | ZR80                         | A+B+                  | [BJ, ST35, 1]                                                                                                                                                  |
| B06         | ATCC9689                     | A+B+                  | [France, ST3, 1] [Canada, unknown, 1] [USA, ST3, 1] [HN, ST3, 1] [SD, ST3, 9] [BJ, ST3, 1] [GD, ST2, 2] [BJ, ST92,1] [BJ, ST55, 2] [BJ, ST8, 2] [BJ, ST129, 1] |
| B07         | SH13                         | A+B+                  | [SH, ST2, 9]                                                                                                                                                   |

|     |           |      |                                                                                                                               |
|-----|-----------|------|-------------------------------------------------------------------------------------------------------------------------------|
| B08 | ZR2       | A+B+ | [BJ, ST102, 1]                                                                                                                |
| B09 | ZR17      | A+B+ | [BJ, ST5, 1]                                                                                                                  |
| B10 | M120      | A+B+ | [UK, ST11, 1] [USA, ST11, 2]                                                                                                  |
| B11 | Qcd_23m63 | A+B+ | [Canada, unknown, 1]                                                                                                          |
| B12 | R20291    | A+B+ | [UK, ST1, 2] [USA, ST1, 2] [Canada, ST1, 5] [France, ST1, 2]                                                                  |
| B13 | M68       | A-B+ | [USA, ST37, 3] [GD, ST37, 9] [BJ, ST37, 4] [HN, ST37, 2] [Belgium, ST37, 1]<br>[Ireland, ST37, 1] [SD, ST37, 1] [SH, ST37, 1] |
| B14 | 5340      | A-B+ | [USA, unknown, 1]                                                                                                             |
| B15 | 1470      | A-B+ | [USA, unknown, 1]                                                                                                             |
| B16 | 8864      | A-B+ | [USA, unknown, 1]                                                                                                             |

---

\*BJ: Beijing; SH: Shanghai; GD: Guangdong; SD: Shandong; HN: Henan.
